# Supplementary material for: Bifunctional interface stabilizer for promoting preferential crystal face adsorption and inducing planar Zn growth
Source: Royal Society of Chemistry journal article supplement (doi:10.1039/d4ta04973j), 2024-01-01
Supplement: d4ta04973j1.pdf [file d4ta04973j1.pdf]

## Supporting Information

### Bifunctional Interface Stabilizer of Promoting Preferential Crystal Face Adsorption and Inducing Planar Zn Growth

#### Experimental Section

**Preparing various electrolytes:** Firstly, 2 mol/L ZnSO<sub>4</sub> solution can be prepared by dissolving the specific amount of ZnSO<sub>4</sub>·7H<sub>2</sub>O (Sinopharm Chemical Reagent Co., Ltd) in deionized water. For the preparation of ZnSO<sub>4</sub>-BIS electrolyte, weighed amount of 2-aminoethanesulfonic acid (Sinopharm Chemical Reagent Co., Ltd) was added into 2 mol/L ZnSO<sub>4</sub> solution and then stirred for 1 h. Specifically, the concentration of BIS should be controlled at 0.1 mol/L.

**Synthesis of MnO<sub>2</sub>:** 0.25 g KMnO<sub>4</sub> and 0.4 g MnSO<sub>4</sub>·H<sub>2</sub>O were added into 15 mL deionized water respectively and stirred for 15 min. The two solutions were mixed together under continuous stirring, and moved into a Teflon-lined autoclave and heated at 160 °C for 12 h. The products were centrifuged, washed with excess amount of deionized water and dried in an oven at 80 °C overnight.

**Material Characterization:** Morphology observations of prepared samples and cycled electrodes could be obtained by Hitachi SU1510 (SEM). In/ex situ XRD patterns and structure component of samples have been determined by Bruker D8 ADVANCE. Nicolet iS50 FT-IR instrument was also used to obtain the ex/in situ FT-IR spectra. Dataphysics OCA20 has been applied for measuring the contact angles. To conduct the in situ optical microscopy test, Zeiss Smartzoom 5 has been applied to monitor the deposition behavior during continuous Zn plating process.

**Electrochemical measurements:** Electrochemical performance of asymmetric and symmetric cells based on GF separators were assembled into CR 2032 coin cells at ambient atmosphere and tested on a Neware battery testing system. Aqueous solution of 2 mol/L ZnSO<sub>4</sub> was selected as the electrolyte, and the amount should be fixed at 60 μL per cell. For full cell test, cathodes were fabricated by dispersing MnO<sub>2</sub>, acetylene

black and PVDF (7:2:1, m/m/m) in the solvent of NMP and casting on the stainless steel foil. After that, the foil was dried in a vacuum oven at 60 °C for 12 h, and then punched into disks with a diameter of 12 mm. All Zn-MnO<sub>2</sub> full cells were added with 2 M ZnSO<sub>4</sub> solution containing MnSO<sub>4</sub> (0.1 M) and tested between 0.8 V and 1.9 V. The CV profiles, CA and Tafel plots of assembled cells were conducted in an electrochemical workstation (CHI660E, Shanghai Chenhua Instrument).

***Theoretical calculation:*** All calculations were performed by the first-principle method through the Cambridge serial total energy package (CASTEP) module in Materials Studio.

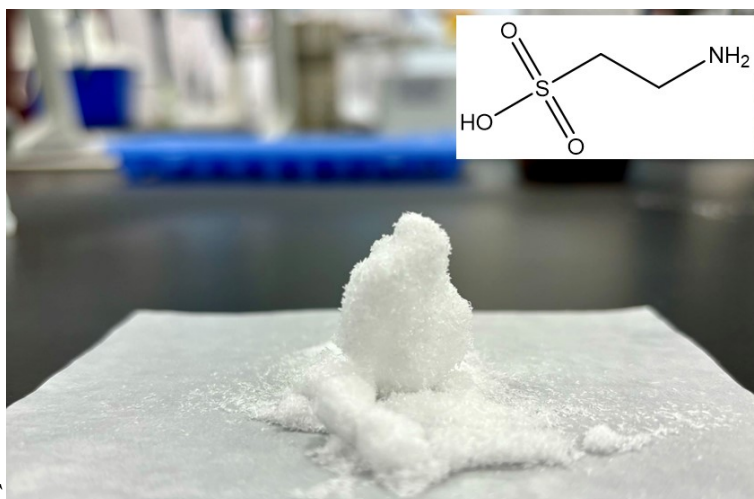

**Fig. S1** Optical image of 2-aminoethanesulfonic acid and molecule structure.

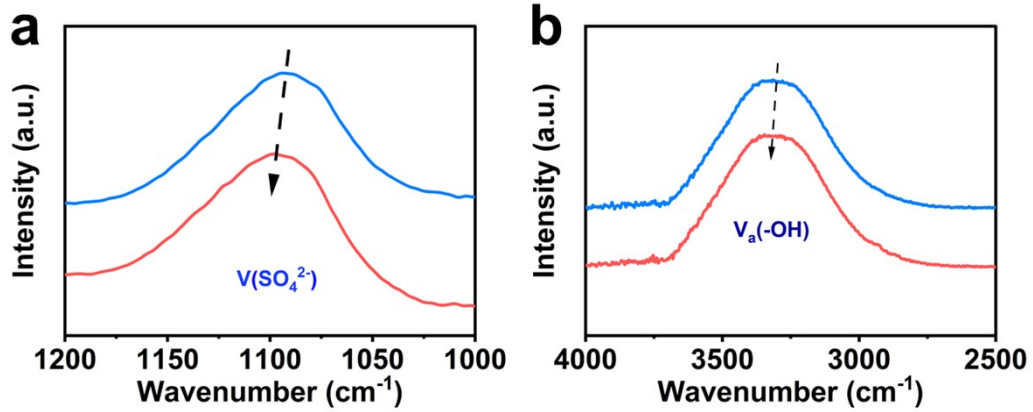

Fig. S2 Typical FTIR spectra for SO<sub>4</sub><sup>2-</sup> and -OH group.

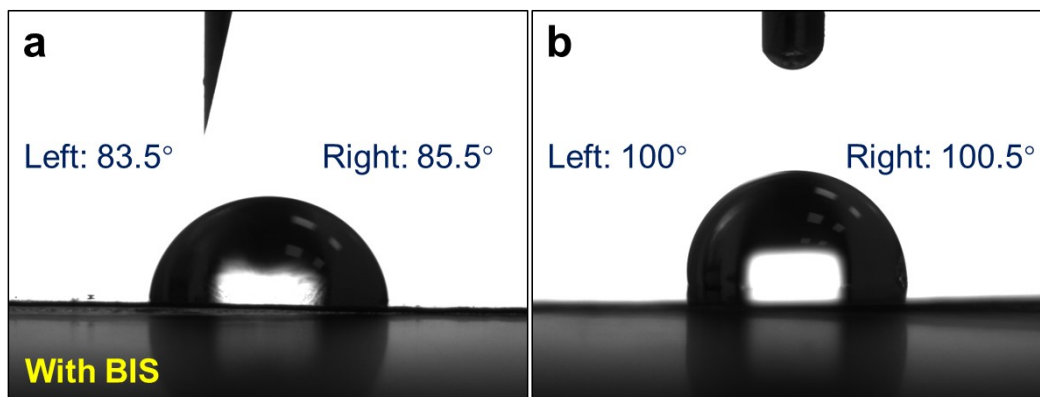

**Fig. S3** Contact angle tests of ZnSO<sub>4</sub>-BIS and pristine ZnSO<sub>4</sub> electrolytes on Zn foil.

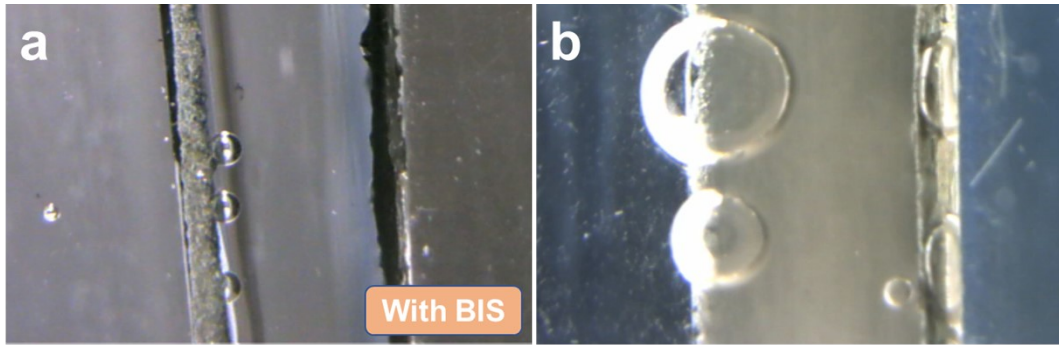

**Fig. S4** Optical images of Zn deposition in (a) ZnSO<sub>4</sub>-BIS and (b) ZnSO<sub>4</sub> electrolyte at 5 mA cm<sup>-2</sup>.

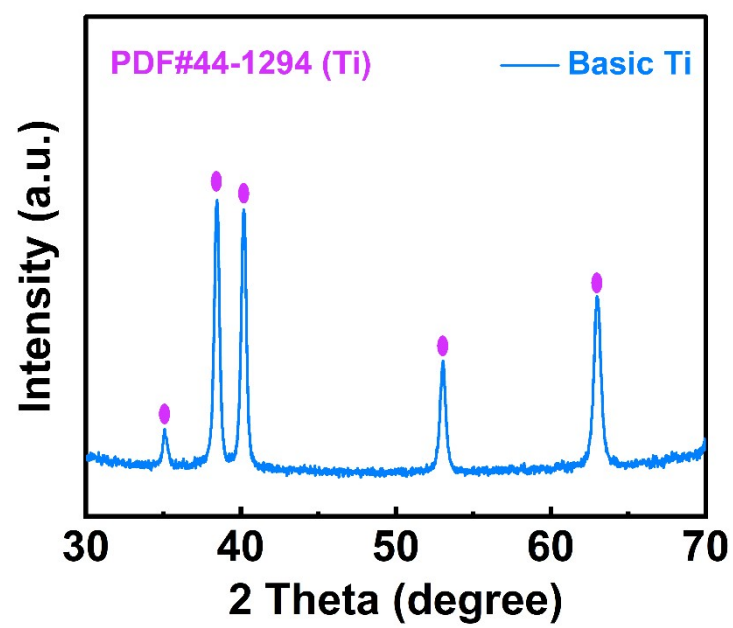

Fig. S5 XRD pattern of Ti substrate.

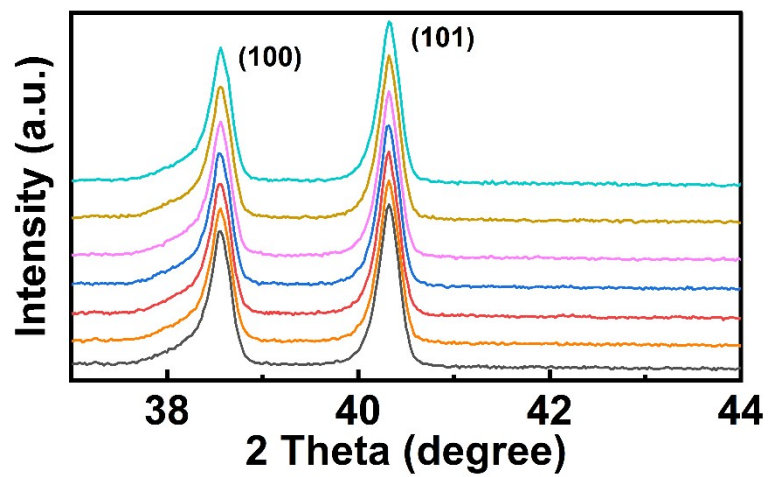

**Fig. S6** *In situ* XRD patterns ZnSO<sub>4</sub>-BIS electrolyte for observing (100) and (101) planes of Zn metal.



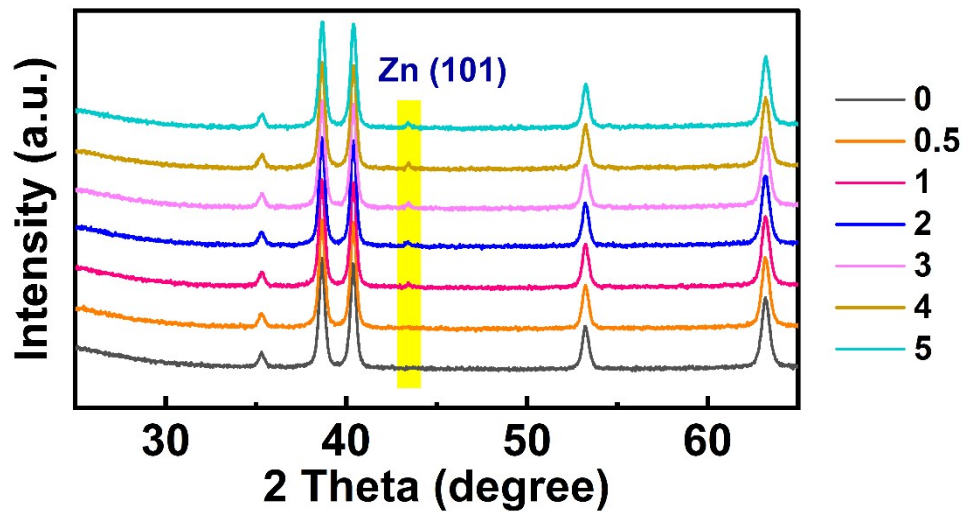

**Fig. S7** In situ XRD patterns of electrodes at various capacities in pristine  $\text{ZnSO}_4$  electrolyte.

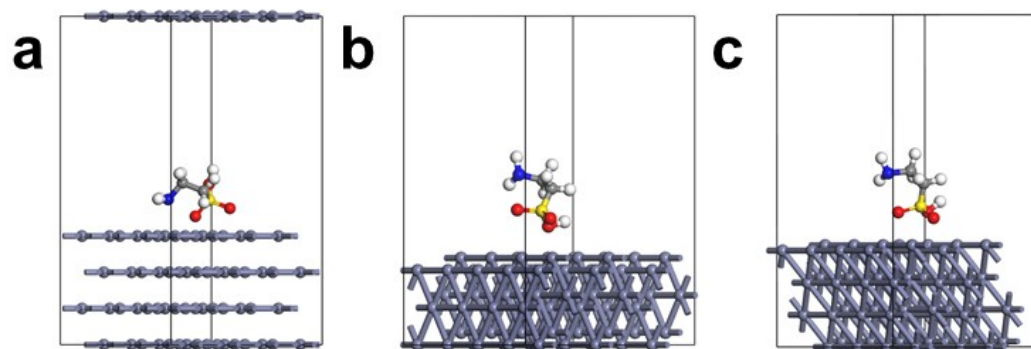

**Fig. S8** Calculation model of sulfonic acid group with (a) (002), (100) and (101) plane of Zn metal.

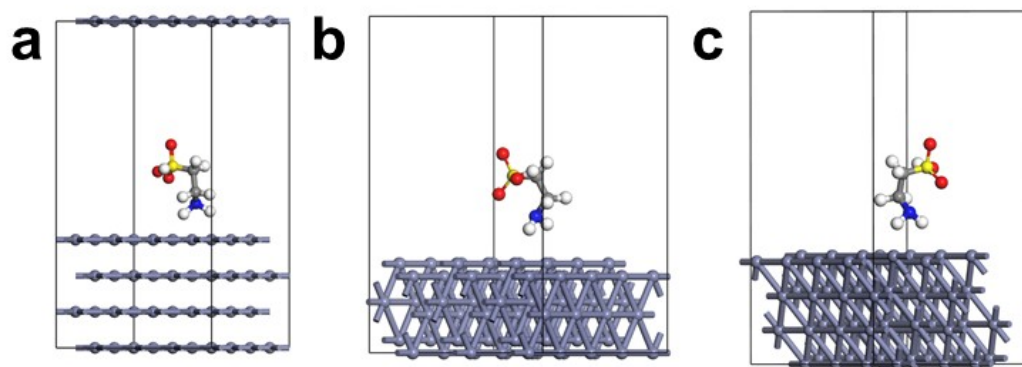

**Fig. S9** Calculation model of amino group with (a) (002), (100) and (101) plane of Zn metal.

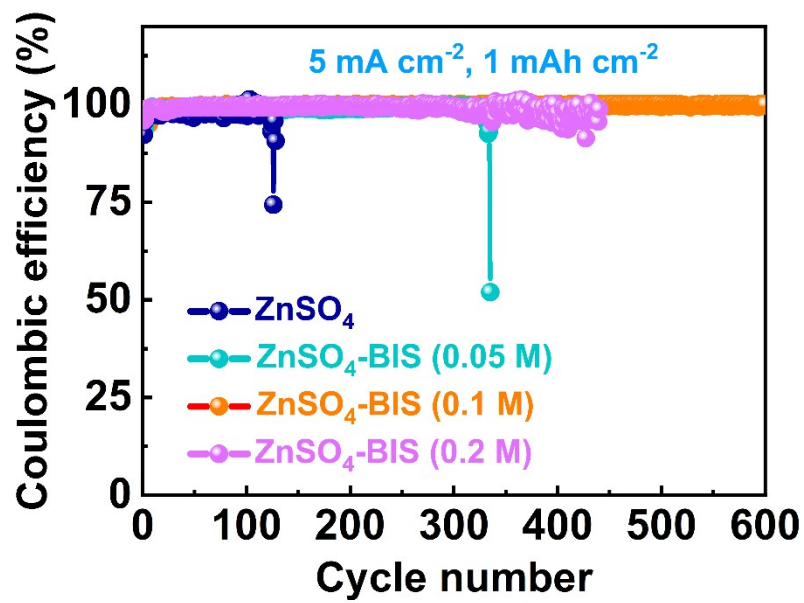

New Fig. S10 The CE plots in different electrolytes at 5 mA cm<sup>-2</sup> and 1 mAh cm<sup>-2</sup>.

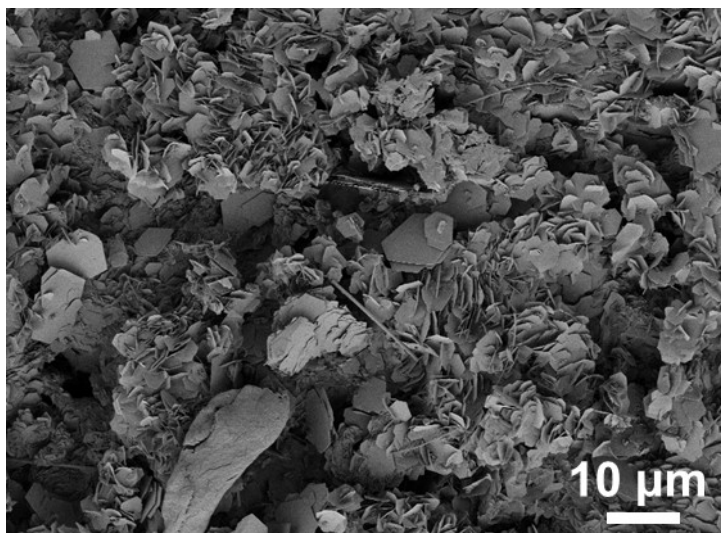

**Fig. S11** SEM image of Zn electrode after 50 cycles in ZnSO<sub>4</sub>.

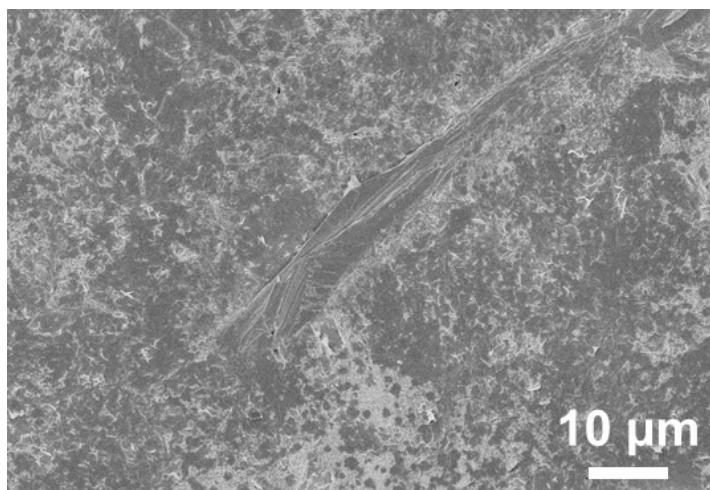

**Fig. S12** SEM image of Zn electrode after 50 cycles in ZnSO<sub>4</sub>-BIS.

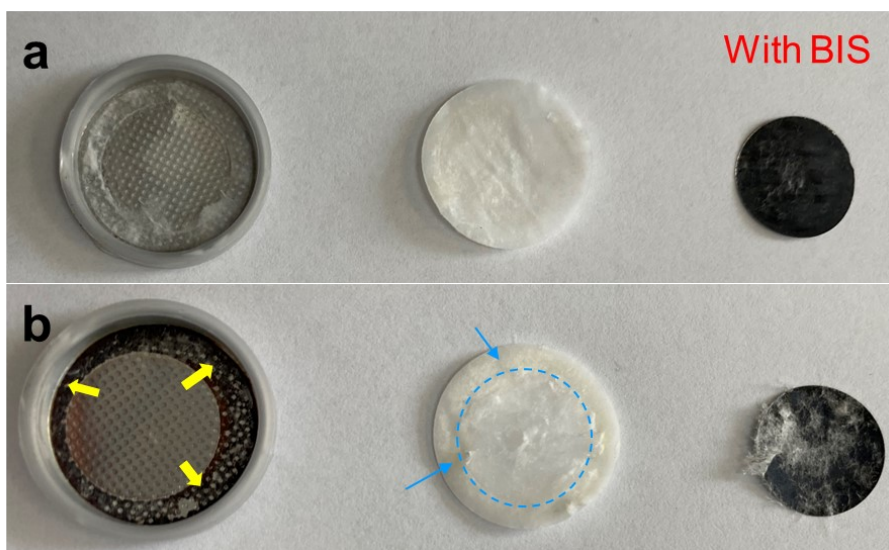

**Fig. S13** Optical images of  $\text{MnO}_2$  electrodes after 150 cycles in (a)  $\text{ZnSO}_4$ -BIS and pristine  $\text{ZnSO}_4$ .

**Table S1** Electrochemical properties comparison of BIS and other electrolyte additives in AZBs.

| Material          | Working condition<br>(mA cm <sup>-2</sup> , mAh cm <sup>-2</sup> ) | Lifespan                            | Ref.             |
|-------------------|--------------------------------------------------------------------|-------------------------------------|------------------|
| <b>BIS</b>        | <b>1, 1</b><br><b>5, 3</b>                                         | <b>4000 h</b><br><b>2000 cycles</b> | <b>This work</b> |
| Ala               | 0.5, 0.25                                                          | 3750 h                              | 1                |
| DA                | 2, 1                                                               | 1000 h                              | 2                |
| Thioacetamide     | 1, 1                                                               | 1200 h                              | 3                |
| HPA               | 0.5, 0.5                                                           | 3000 h                              | 4                |
| MPS               | 1, 1<br>1, 1                                                       | 1000 h<br>850 cycles                | 5                |
| BMIM <sup>+</sup> | 1, 0.5<br>2, 0.5                                                   | 3500 h<br>3500 cycles               | 6                |
| Adenosine         | 1, 1                                                               | 1000 cycles                         | 7                |
| Nicotinic acid    | 1, 1                                                               | 1300 cycles                         | 8                |
| Mlz               | 1, 1                                                               | 1500 h                              | 9                |
| glycerol          | 1, 1                                                               | 1500 h                              | 10               |
| PEO               | 1, 1                                                               | 1500 cycles                         | 11               |
| PEO               | 1, 1                                                               | 630 cycles                          | 12               |
| Taurine           | 1, 1                                                               | 3000 h                              | 13               |
| EDA               | 1, 1                                                               | 3000 h                              | 14               |

## Reference

- 1 G. Z. Guo, C. C. Ji, J. D. Lin, T. L. Wu, Y. L. Luo, C. R. Sun, M. J. Li, H. Y. Mi, L. X. Sun, H. J. Seifert, *Angew. Chem. Int. Edit.* **2024**, DOI: 10.1002/anie.202407417.
- 2 Y. Yang, Y. Z. Li, Q. Z. Zhu, B. Xu, *Adv. Funct. Mater.*, **2024**, DOI: 10.1002/adfm.202316371.
- 3 K. X. Ren, M. Li, Q. H. Wang, B. H. Liu, C. Sun, B. Y. Yuan, C. Lai, L. F. Jiao, C. Wang, *Nano-Micro Lett.*, **2024**, 16, 117.
- 4 Z. M. Yang, Y. L. Sun, S. T. Deng, H. Tong, M. Q. Wu, X. B. Nie, Y. F. Su, G. J. He, Y. H. Zhang, J. W. Li, G. L. Chai, *Energ. Environ. Sci.*, **2024**, 17, 3443-3453.
- 5 T. Q. Wu, C. Hu, Q. Zhang, Z. F. Yang, G. H. Jin, Y. X. Li, Y. G. Tang, H. H. Li, H. Y. Wang, *Adv. Funct. Mater.*, **2024**, DOI: 10.1002/adfm.202315716.
- 6 C. C. Fan, W. J. Meng, J. Han, T. H. Li, D. P. Zuo, S. X. Deng, D. S. Li, L. Jiang, *Energy Storage Mater.*, **2024**, 71, 103554.
- 7 O. Y. Li, K. C. Long, M. Fu, J. Zhou, C. L. Li, W. Y. Tang, B. Wang, L. L. Jiang, Y. J. Chen, L. B. Chen, *Energy Storage Mater.*, **2024**, 71, 103569.



- 8 S. N. Zheng, K. Zhang, B. Luo, L. L. Sun, Z. Bao, G. S. Duan, J. Y. Huang, Z. L. Gu, Z. Z. Ye, Y. Wang, *Energy Storage Mater.*, **2024**, 71, 103588.
- 9 J. Cao, M. Z. Sun, D. D. Zhang, Y. F. Zhang, C. W. Yang, D. Luo, X. L. Yang, X. Zhang, J. Q. Qin, B. L. Huang, Z. Y. Zeng, J. Lu, *ACS Nano*, **2024**, 18, 16610-16621.
- 10 Y. J. Zhang, M. Zhu, K. Wu, F. F. Yu, G. Y. Wang, G. Xu, M. H. Wu, H. K. Liu, S. X. Dou, C. Wu, *J. Mater. Chem. A*, **2021**, 9, 4253-4261.
- 11 Y. Jin, K. S. Han, Y. Y. Shao, M. L. Sushko, J. Xiao, H. L. Pan, J. Liu, *Adv. Funct. Mater.*, **2020**, 30, 202003932.
- 12 M. D. Yan, C. L. Xu, Y. Sun, H. L. Pan, H. Li, *Nano Energy*, **2021**, 82, 105739.
- 13 X. Xu, J. Y. Yin, R. M. Qin, H. L. Liu, X. Feng, M. H. Wang, M. Y. Li, W. Y. Sun, W. C. Shi, B. Xiao, Y. Q. Su, Y. H. Cheng, *J. Energy Chem.*, **2023**, 86, 343-350.
- 14 L. F. Deng, X. F. Xie, W. W. Song, A. Q. Pan, G. Z. Cao, S. Q. Liang, G. Z. Fang, *Chem. Eng. J.*, **2024**, 488, 151104.
